# Supplementary material
Source: publisher site journal article supplement (https://www.spandidos-publications.com/8565/downloadSupplementary)
Supplement: Supplementary file 1 [file downloadSupplementary]

Table SI. Hypoxia- and glycolysis-associated genes.

| No. | Gene symbol |
|-----|-------------|
| 1   | CLSTN1      |
| 2   | ATP2A2      |
| 3   | FAT2        |
| 4   | COL7A1      |
| 5   | SLC2A1      |
| 6   | PTGFRN      |
| 7   | DYNC1H1     |
| 8   | HSPG2       |
| 9   | DSG2        |
| 10  | NFE2L1      |
| 11  | PTK7        |
| 12  | ITPR3       |
| 13  | IGSF3       |
| 14  | VEGFA       |
| 15  | RRBP1       |
| 16  | PLXNA1      |
| 17  | AHNAK2      |
| 18  | GANAB       |
| 19  | FAM120A     |
| 20  | GALNT2      |
| 21  | LAMP2       |
| 22  | MYOF        |
| 23  | GJA1        |
| 24  | FAM83H      |
| 25  | CLPTM1L     |
| 26  | TLN1        |
| 27  | COL4A5      |
| 28  | CERS6       |
| 29  | STT3B       |
| 30  | HYOU1       |
| 31  | ESYT2       |
| 32  | IMPAD1      |
| 33  | KIF13A      |
| 34  | PURB        |
| 35  | KIAA0930    |
| 36  | TANC2       |
| 37  | KPNA6       |
| 38  | NCOA6       |
| 39  | NOMO1       |
| 40  | TNRC18      |
| 41  | PAM         |
| 42  | KIAA2013    |
| 43  | DUS1L       |
| 44  | SDK2        |
| 45  | YTHDF1      |
| 46  | CRIM1       |
| 47  | CLOCK       |
| 48  | MYO5A       |

|    |          |
|----|----------|
| 49 | CSNK2A2  |
| 50 | NUMBL    |
| 51 | LAMC2    |
| 52 | LAMB3    |
| 53 | COL17A1  |
| 54 | FLNA     |
| 55 | ITGA6    |
| 56 | ITGB1    |
| 57 | ITGB4    |
| 58 | APP      |
| 59 | LAMA3    |
| 60 | ITGA3    |
| 61 | TNC      |
| 62 | ACTN1    |
| 63 | KTN1     |
| 64 | SERPINE1 |
| 65 | CD44     |
| 66 | CDH3     |
| 67 | APLP2    |
| 68 | PTHLH    |
| 69 | ITGB6    |
| 70 | MSN      |
| 71 | MYO1B    |
| 72 | MT-ND6   |
| 73 | PDPN     |
| 74 | LAMC1    |
| 75 | DUSP6    |
| 76 | ITGA5    |
| 77 | TENM2    |
| 78 | CALD1    |
| 79 | LTBP1    |
| 80 | GLG1     |
| 81 | FST      |
| 82 | DKK3     |
| 83 | COL5A1   |
| 84 | PXN      |
| 85 | SLC16A1  |
| 86 | COL12A1  |
| 87 | MYO10    |
| 88 | MAP4K4   |
| 89 | PCDH7    |
| 90 | ARHGAP21 |
| 91 | TIMP3    |
| 92 | TRIO     |
| 93 | HEG1     |
| 94 | COL5A2   |
| 95 | NRG1     |
| 96 | TGFBR1   |
| 97 | EXT2     |
| 98 | EHD2     |

|     |         |
|-----|---------|
| 99  | MXRA5   |
| 100 | KDM1A   |
| 101 | OLFML2A |
| 102 | IRS1    |
| 103 | PDE7A   |
| 104 | FOXC2   |

---

Table SII. Hazard ratios of critical hypoxia- and glycolysis-associated genes.

| Gene           | Hazard ratio (95% confidence interval) |                  | P-value   |          |
|----------------|----------------------------------------|------------------|-----------|----------|
|                | TCGA-OSCC                              | GSE65858         | TCGA-OSCC | GSE65858 |
| <i>HSPG2</i>   | 1.64 (1.01-2.67)                       | 1.31 (0.98-1.75) | <0.05     | <0.05    |
| <i>IGSF3</i>   | 0.73 (0.53-1.00)                       | 0.77 (0.57-1.03) | <0.001    | <0.001   |
| <i>DUS1L</i>   | 0.51 (0.22-1.16)                       | 0.52 (0.31-0.89) | <0.05     | <0.001   |
| <i>DYNC1H1</i> | 2.02 (1.31-3.11)                       | 1.32 (0.98-1.78) | <0.001    | <0.05    |

TCGA, The Cancer Genome Atlas; OSCC, oral squamous cell carcinoma; HSPG2, heparan sulfate proteoglycan 2; IGSF3, immunoglobulin superfamily member 3; DUS1L, dihydrouridine synthase 1 like; DYNC1H1, dynein cytoplasmic 1 heavy chain 1.
